# Supplementary material for: Nanostrucutured MnO2-TiN Nanotube Arrays for Advanced Supercapacitor Electrode Material
Source: Research Square preprint supplement (doi:10.21203/rs.3.rs-1011104/v1), 2021-11-03
Supplement: Supplementary file 1 [file c1d7deac43da63ac9d2efeab.docx]

Supplementary Material

Nanostructured MnO2 modified TiN nanotube arrays for advanced supercapacitor electrode material

Peng Ren*a,c**, Chao Chen *b**, Xiuchun Yang *a,c,d †*

a) Shanghai Key Laboratory of R&D for Metallic Functional Materials, Tongji University, Shanghai, 201804, PR China

b) School of Chemistry and Civil Engineering, Shaoguan University, Shaoguan 512005, PR China

c) School of Materials Science and Engineering, Tongji University, Shanghai, 201804, PR China

d) Key Laboratory of Advanced Civil Engineering Materials (Tongji University), Education of Ministry, Shanghai 201804, PR of China

* These authors contributed equally to this work.

† Corresponding E-mail: yangxc@tongji.edu.cn

**Materials and methods**

*Chemicals*: Ti mesh (50 meshes, 99.5% purity) with the thickness of 0.12 mm and 40 wt.% hydrofluoric acid. All reagents are analytical grade and used without further purification.

*Preparation of TONM*: A large piece of raw Ti mesh was cut into square pieces of 2.5 × 2.5 cm2, which were ultrasonically degreased in acetone, isopropanol, and methanol for 15 min, respectively, and then chemically etched in a mixture of HF and HNO3 aqueous solution (HF:HNO3:H2O = 1:4:10 in volume) for 10 s, afterwards rinsed with deionized water and finally dried in air. Electrochemical anodic oxidation was performed at 60 V direct current voltages for 24 h in DEG solution containing 1.5 vol.% HF, using Ti mesh as the working electrode and Pt plate as counter electrode. The as-prepared samples were ultrasonically rinsed with deionized water and dried in air.

*Preparation of TNNM*: TONM samples in a quartz boat were placed in the heating center of a horizontal quartz tube vacuum furnace. Prior to heating, the system was evacuated and flushed with high pure N2 to eliminate oxygen. Afterwards, the furnace was heated in N2 to 750 °C, and then changed to NH3 flow keeping a flow rate of 100 mL min-1 for 5 h while the temperature was maintained. Finally, the furnace cooled down to room temperature in N2.

*Preparation of MnO2 modified TNNM*: Different precursor solutions were employed for synthesizing MnO2 nanostructures by hydrothermal synthesis method. A TNNM sample was placed at the bottom of the reaction solution in sealed 150 mL Teflon-lined autoclave, which was put into a muffle furnace for hydrothermal reaction. The solution compositions and reaction conditions are summarized in Table S1.

Table S1. The precursor solution compositions and hydrothermal reaction conditions for preparing nanostructured MnO2.

| Solution | KMnO4 | MnSO4·H2O | HCl | H2O | Temperature  [°C] | Time  [h] | Sample |
| --- | --- | --- | --- | --- | --- | --- | --- |
| M-1 | 0.875 g | 0.35 g | - | 70 mL | 140 | 3 | TN-MO-SS |
| 12 | TN-MO-S |
| 18 | TN-MO-SR |
| M-2 | 1.106 g | - | 0.88 mL | 70 mL | 150 | 6 | TN-MO-RS |
| M-3 | 0.7875 g | - | 1.75 mL | 70 mL | 150 | 12 | TN-MO-R |

*Characterization*: The crystalline phase compositions of the samples were measured by a Rigaku D/Max 2550VB3+/PC X-ray diffractometer (XRD) equipped with graphite monochromatized Cu Kα radiation (λ = 0.15405 nm). Nanostructures and elemental distributions of the samples were characterized by a Schottky field emission scanning electron microscopy (FESEM, FEI Nova NanoSEM 450) equipped with energy dispersive spectroscope (EDS, EDAX).

*Electrochemical performance measurement*: Electrochemical measurements were carried out with CHI660E electrochemical three-electrode system in 2 mol L-1 KCl solution, where the samples acted as the working electrode, Pt foil acted as the counter electrode, and Ag/AgCl electrode acted as the reference electrode. Cyclic voltammetry (CV) curves were obtained in a voltage range from -0.2 V to 0.8 V at different scan rates of 5, 10, 20, 40, 60, 80 and 100 mV s-1, respectively. Galvanostatic charge/discharge curves were recorded in a potential window from -0.2 V to 0.8 V at a series of current densities. The electrochemical impedance spectroscopy (EIS) was conducted in the frequency from 100 kHz to 10 mHz at an open-circuit potential vibration of 5 mV.


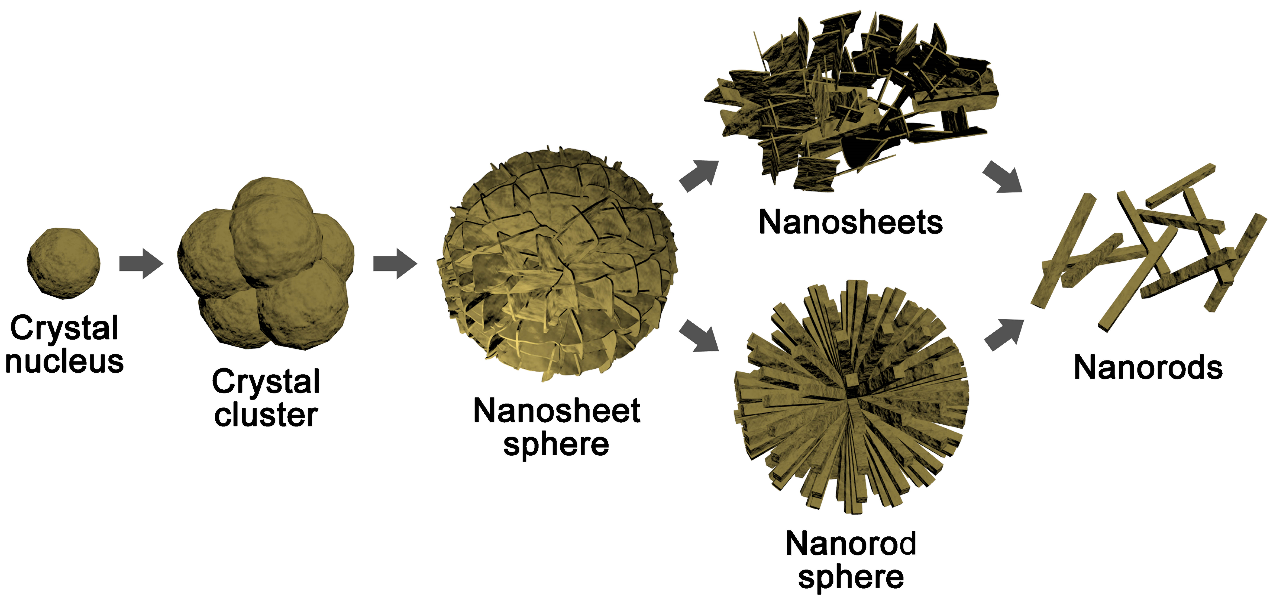


Figure S1. Schematic diagrams of MnO2 nanostructure growth process.





Figure S2. Schematic diagrams of δ-MnO2 and α-MnO2 crystal structure.


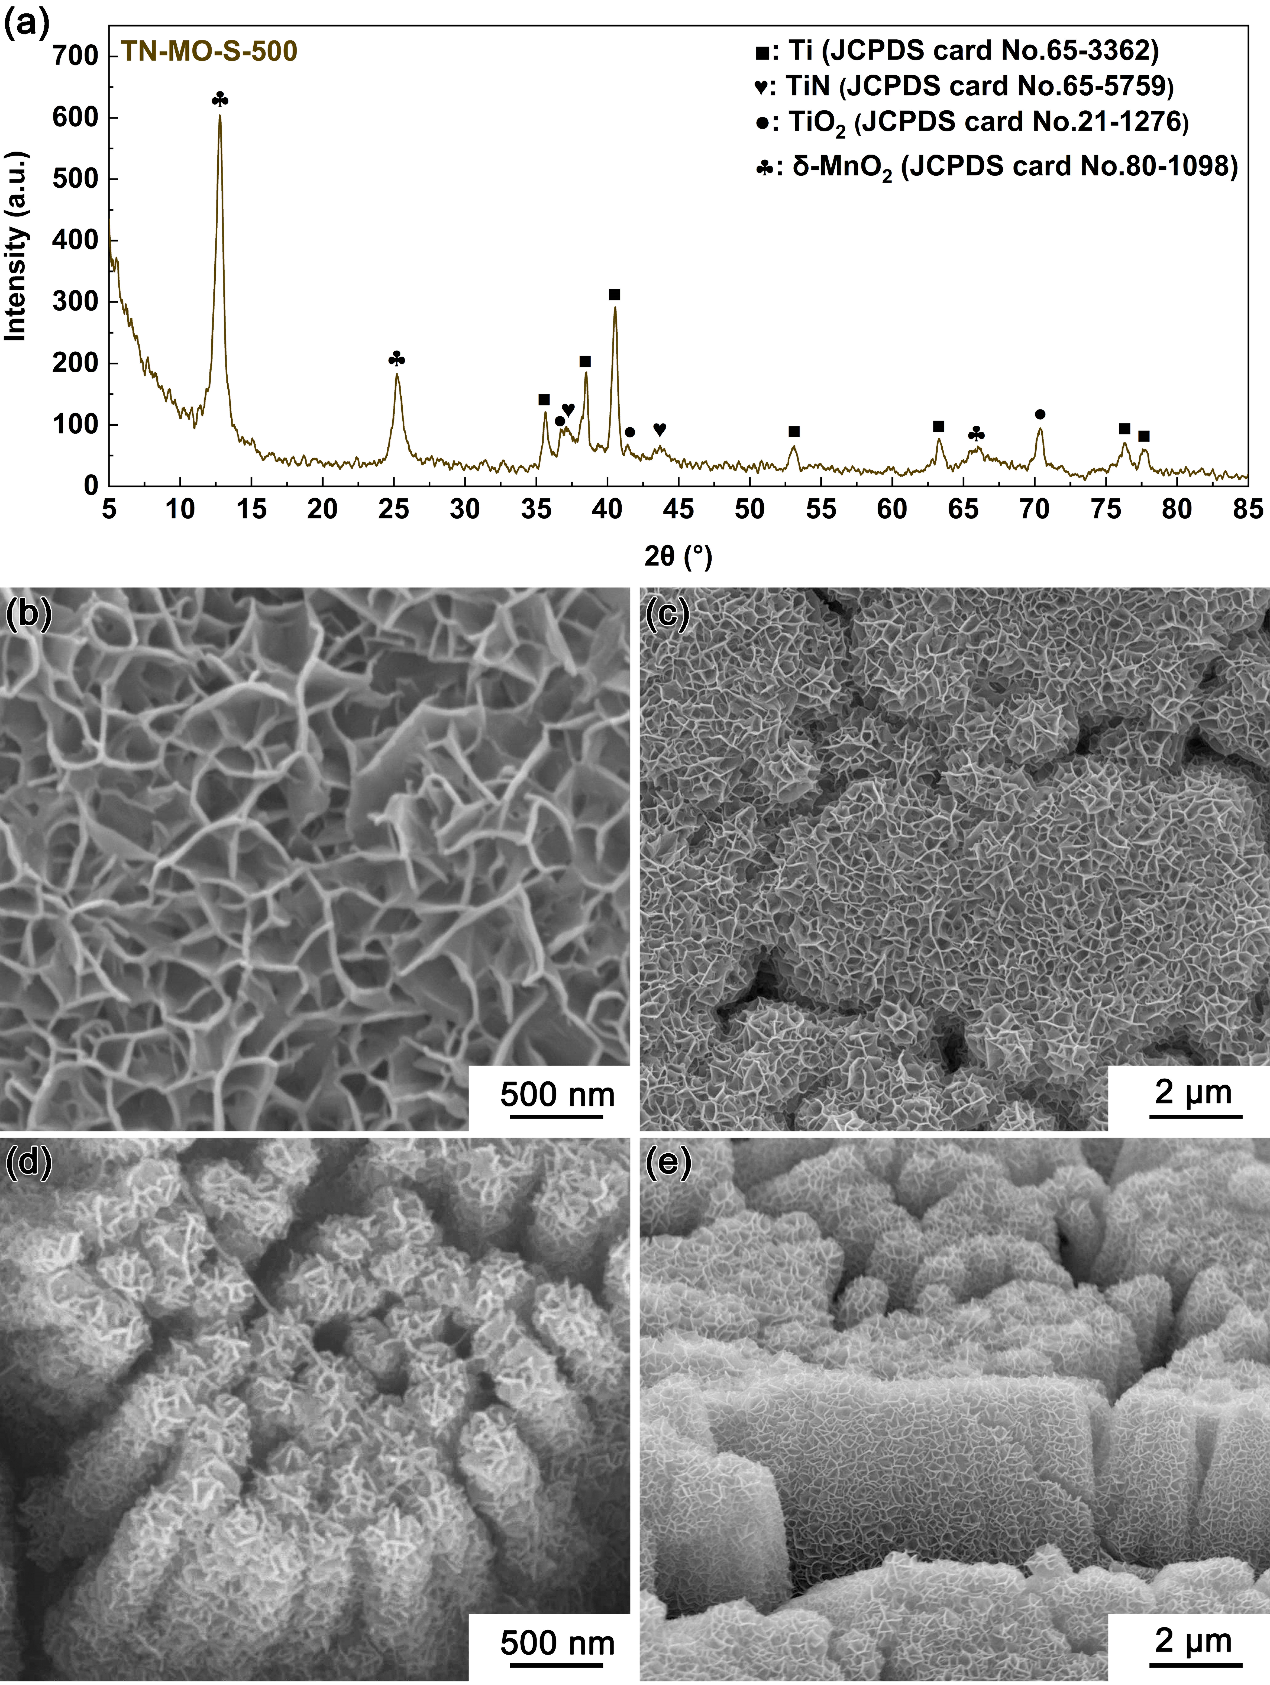


Figure S3. XRD pattern (a) and SEM images (b-e) of TN-MO-S-500.
